1

2 **Efficient generation of zebrafish maternal-zygotic mutants through**  
3 **transplantation of ectopically induced and Cas9/gRNA targeted PGCs**

4 Fenghua Zhang<sup>1,2</sup>, Xianmei Li<sup>1,2</sup>, Mudan He<sup>1,2</sup>, Ding Ye<sup>1,2</sup>, Feng Xiong<sup>1,2</sup>, Golpour Amin<sup>1,2</sup>,  
5 Zuoyan Zhu<sup>1,2</sup>, Yonghua Sun<sup>1,2,\*</sup>

6 1. State Key Laboratory of Freshwater Ecology and Biotechnology, Institute of  
7 Hydrobiology, Chinese Academy of Sciences, Innovation Academy for Seed Design,  
8 Wuhan 430072, China

9 2. College of Advanced Agricultural Sciences, University of Chinese Academy of  
10 Sciences, Beijing 100049, China

11

12 \* *Corresponding author, Email: [yhsun@ihb.ac.cn](mailto:yhsun@ihb.ac.cn)*

13

14 **ABSTRACT**

15 The CRISPR/Cas9 technology has been widely utilized for knocking out genes  
16 involved in various biological processes in zebrafish. Despite this technology is efficient for  
17 generating different mutations, one of the main drawbacks is low survival rates during  
18 embryogenesis when knocking out some embryonic lethal genes. To overcome this  
19 problem, we developed a novel strategy using a combination of CRISPR/Cas9 mediated  
20 gene knockout with primordial germ cells (PGCs) transplantation to facilitate and speed up  
21 the process of zebrafish mutant generation, particularly for embryonic lethal genes. First,  
22 we optimized the procedure for gRNA targeted PGCs transplantation (PGCT), by  
23 increasing the efficiencies of genome mutation in PGCs and induction of PGCs fates in  
24 donor embryos for PGCT. Second, the combined CRISPR/Cas9 with PGCT was utilized  
25 for generation of maternal zygotic (MZ) mutants of *tcf7l1a* (essential gene for head  
26 development), *pou5f3* (essential gene for zygotic genome activation) and *chd* (essential  
27 gene for dorsal development) at F1 generation with high efficiency. Finally, we revealed  
28 some novel phenotypes in the maternal zygotic mutant of *tcf7l1a* and *chd*, while *MZtcf7l1a*  
29 showed elevated neural crest development, and *MZchd* have stronger ventralization than  
30 its zygotic counterparts. Therefore, this study presents an efficient and powerful method  
31 for generating MZ mutants of embryonic lethal genes in zebrafish.

32 **KEYWORDS:** Zebrafish, CRISPR/Cas9, Primordial germ cells, Transplantation, Maternal  
33 zygotic mutant

## 34 1. INTRODUCTION

35 The rapid development and wide-range application of CRISPR/Cas9 technology  
36 substantially revolutionized the genetic studies in various organisms including zebrafish  
37 (BASSETT *et al.* 2013; HWANG *et al.* 2013; TZUR *et al.* 2013). The zebrafish has been  
38 recognized as an excellent vertebrate model organism for studies of vertebrate genetics  
39 and development, human diseases and fish physiology (SUN 2017). The CRISPR/Cas9  
40 mediated knockout has been well established in zebrafish (CHANG *et al.* 2013; HWANG *et*  
41 *al.* 2013), and its application has led to generation of large number of genetic-null models  
42 and unprecedented possibilities for genomic manipulation. However, using CRISPR/Cas9  
43 to knock out the essential genes involved in early embryogenesis is still challenging,  
44 because obtaining high-efficiency knockout of essential genes may result in embryonic  
45 lethality in the F0 generation. This consequently leads to the failure of germline  
46 transmission of null alleles. For instance, induction of mutagenesis of *chd*, a gene essential  
47 for the shield formation during gastrulation (HAMMERSCHMIDT *et al.* 1996), using  
48 conventional CRISPR/Cas9 technology causes serious ventralization and embryonic  
49 lethality (ZHANG *et al.* 2016b), which would prevent us from obtaining adult mutants for  
50 further germline screening.

51 In zebrafish, large amount of RNAs and proteins are maternally deposited, referred as  
52 maternal factors encoded by maternal genes, which are essential for early embryonic  
53 development (DOSCH *et al.* 2004; WAGNER *et al.* 2004). The function of maternal genes  
54 have been widely studied through generation of maternal zygotic mutants in zebrafish  
55 (REIM AND BRAND 2006; VEIL *et al.* 2018). It is noteworthy that, generating homozygous  
56 mutants using conventional CRISPR/Cas9 needs a lot of zebrafish facilities and is also  
57 time consuming because three generations are usually required (PATTON AND ZON 2001).  
58 However, for the maternal genes, on the premise of survival of homozygous mutants, one  
59 more cross within them has to be carried out in order to obtain maternal zygotic mutants.  
60 If homozygous mutants are lethal at early embryogenesis, corresponding mRNAs will be  
61 considered to overexpress to have a rescue (BURGESS *et al.* 2002). Otherwise, if mRNA  
62 rescued homozygous mutants could not survive to adulthood, primordial germ cells (PGCs)

63 of homozygotes could be utilized to transfer into germ cell depleted host embryos, in order  
64 to obtain the maternal zygotic mutant (CIRUNA *et al.* 2002a). With the advancement of  
65 CRISPR/Cas9 technology in zebrafish, it is possible to directly mutate the genome of PGCs  
66 by Cas9/gRNA injection and to transplant the mutated PGCs into host embryos to produce  
67 gametes harboring mutations of lethal genes. Recently, certain PGCs manipulation  
68 technologies, such as PGCs-targeted overexpression (XIONG *et al.* 2013) and ectopic  
69 PGCs induction (YE *et al.* 2019b), have been successfully established in zebrafish embryos.  
70 Therefore, it is possible to improve the PGCs transplantation (PGCT) efficiency in zebrafish  
71 by utilizing those PGCs manipulation methods.

72 In this study, we firstly established and optimized the procedure for gRNA targeted  
73 PGCT by increasing the PGCs mutation efficiency and PGCT success rate. We then  
74 utilized the optimized procedure for generation of maternal zygotic (MZ) mutants of *tcf7l1a*  
75 (essential gene for head development) and *pou5f3* (essential gene for zygotic genome  
76 activation) and *chd* (essential gene for dorsal development) at F1 generation with high  
77 efficiency. This technology can be applied to the large-scale generation of other embryonic  
78 lethal mutants, especially for the gene function analysis of large number of maternal factors.

79

## 80 **MATERIALS AND METHODS**

### 81 *Ethics*

82 This study was carried out in accordance with Guide for the Care and Use of  
83 Laboratory Animals at University of Chinese Academy of Sciences and Institute of  
84 Hydrobiology, Chinese Academy of Sciences.

85

### 86 *Fish and embryos*

87 The experimental fish used in this study were wild-type (WT) zebrafish of AB line, the  
88 transgenic line of *Tg(piwi:egfp-UTRnos3)<sup>ihb327Tg</sup>* (YE *et al.* 2019a), and the *chd<sup>tt250/+</sup>* mutants  
89 (SCHULTE-MERKER *et al.* 1997) housed in China Zebrafish Resource Center (Wuhan, China,  
90 <http://zfish.cn>) and raised at 28.5 °C with a 14h:10h light and dark cycle. The embryos for  
91 microinjection and PGCT were harvested from natural fertilization. The stages of  
92 embryonic development were identified according to Kimmel *et al.* (KIMMEL *et al.* 1995).

93

94 *gRNA design and synthesis*

95 The sequence and structure information of *tcf7l1a* (ENSDARG00000038159), *pou5f3*  
96 (ENSDARG00000044774) and *chd* (ENSDARG00000006110) were obtained from  
97 zebrafish genomic database ([http://www.ensembl.org/Danio\\_rerio/Info/Index](http://www.ensembl.org/Danio_rerio/Info/Index)), and the  
98 gRNA target sites for each gene were designed on the website of  
99 <http://zifit.partners.org/ZiFiT/>. The effective gRNA target sites are as follows, *tcf7l1a*-target:  
100 GGAGGAGGAGGTGATGACCTGGG, *pou5f3*-target:  
101 GGGTGAACTACTACACGCCATGG, and *chd*-target:  
102 GGATTACCAGCTGCTGGTGGCGG, which locate in N-terminal CTNNB1 binding domain  
103 coding sequence, exon1 of the genomic sequence, and the CHR domain coding  
104 sequence of *tcf7l1a*, *pou5f3* and *chd*, respectively. The underlined sequences show PAM  
105 (Protospacer adjacent motif).

106 The gRNA templates were prepared by PCR with gene specific primers (*tcf7l1a*-  
107 gRNA-1, *pou5f3*-gRNA-1, *chd*-gRNA-3) and a universal reverse primer gRNA-RP using  
108 plasmid pT7-gRNA as template according to previous study (CHANG *et al.* 2013). gRNAs  
109 were transcribed with MAXI script T7Kit (Ambion, USA). The primers used in this study are  
110 shown in Table 1.

111

112 *Microinjection of mRNA and gRNA*

113 The plasmids used for preparation of *cas9-UTRsv40* mRNA (ZHANG *et al.* 2016a), *gfp*-  
114 *UTRnos3* mRNA (XIONG *et al.* 2013) and *buc-UTRsv40* mRNA (YE *et al.* 2019b) were  
115 described previously. The *nos3* 3'-UTR was utilized to replace the *sv40* 3'-UTR in  
116 pT3:cas9-UTRsv40 to generate the PGCs-targeted Cas9 expression construct, pT3:cas9-  
117 UTRnos3. The mRNAs were transcribed using mMessage mMachine T3 UltraKit or  
118 mMessage mMachine SP6 UltraKit (Ambion, USA). *cas9-UTRnos3* mRNA, *gfp-UTRnos3*  
119 mRNA and gRNA were injected with dosages of 400 pg, 200 pg and 100 pg per embryo,  
120 respectively.

121

122 *Fluorescent-activated cell sorting (FACS)*

123 The transgenic embryos of *Tg(piwi:egfp-UTRnos3)<sup>ihb327Tg</sup>* at 1-cell stage were co-  
124 injected with either *cas9-UTRsv40* or *cas9-UTRnos3* mRNA and gRNA. At 2 dpf, the  
125 embryos were washed three times in PBS and then about 200 embryos were transferred  
126 into a 15 mL centrifuge tube (BD Falcon™ Tube) with 10mL 0.25% trypsin. Trypsin treated  
127 embryos were passed through the syringe for 2 to 3 times to generate cell suspension, and  
128 the cell suspension was passed through a 100µm cell strainer, centrifuged for 10 min in 4  
129 °C at 200 g. The precipitated cells were washed two times with 2% FBS/PBS and finally  
130 resuspended in 1% FBS/PBS for sorting of the GFP-positive PGCs by using a flow  
131 cytometry (FACSVerse, BD Biosciences). The GFP-negative somatic cells and GFP-  
132 positive PGCs after sorting were subject to evaluation of mutation efficiencies.

133

#### 134 *Evaluation of mutation efficiency*

135 Total DNA was isolated from the putative mutant embryos or cells, and PCR analyzed  
136 with certain primers which could amplify the mutant regions. The PCR products were  
137 cloned into T-vector and subject to Sanger sequencing and sequence analysis. Except  
138 particular indication, each experiment was carried out as three independent trials.

139

#### 140 *PGCs Transplantation*

141 Various types of *cas9* mRNA/gRNA co-injected donor embryos were raised till blastula  
142 stage. Meanwhile, 100nM of *dead end (dnd)* antisense morpholino oligonucleotide (5'-  
143 GCTGGGCATCCATGTCTCCGACCAT-3') was injected into host embryos to eliminate  
144 endogenous PGCs according to previous report (WEIDINGER *et al.* 2003). Fluorescent  
145 donor embryos and PGCs-depleted host embryos at 3 hour-post-fertilization (3 hpf) were  
146 manipulated in 1×Danieau's buffer under a dissecting microscope (MZX7, Olympus).  
147 Briefly, 60-100 cells at marginal region of the donor embryos were grafted into the blastula  
148 margin of PGCs-depleted host embryos. At 1 hpt (hour post transplantation), the  
149 transplanted embryos were transferred to agarose plates filled with 0.3×Danieau's buffer  
150 for further development. At 35hpf (hours post fertilization), the PGCs positive transplants  
151 were screened under an Olympus fluorescence microscope (MVX10) and raised to  
152 adulthood.

153

154 *Hybridization of transplanted adults and genotyping of the F1 embryos*

155 The PGCs-transplanted larval fish were raised with great care and they usually  
156 became sexually matured at 2.5 months post-transplantation. Adults of transplanted fish  
157 were crossed with WT fish one by one to generate F1 population. To evaluate the mutation  
158 rates of the gametes of the transplanted fish, 10 F1 embryos at 1 dpf were randomly  
159 selected for PCR amplification of the gRNA target sites. The PCR products were sub-  
160 cloned and the sub-cloned fragments were subject to Sanger sequencing to analyze the  
161 mutation type and mutation efficiency. Each fish was analyzed for three independent times.

162 The male and female transplanted fish with the highest mutation efficiency in their  
163 gametes were selected for incross. The incrossed embryos were phenotypically analyzed  
164 with a MVX10 microscope and used for further analysis.

165

166 *Whole-mount in situ hybridization*

167 The WT or incrossed embryos were fixed with 4% paraformaldehyde (PFA) and  
168 digoxigenin (DIG)-labeled RNA probes were used for whole-mount *in situ* hybridization  
169 (WISH) according to previous study (WEI *et al.* 2014).

170

171 *Fluorescent in situ hybridization on section*

172 8-month old female fish were dissected and their ovaries were fixed with 4% PFA  
173 overnight at 4°C and cryosectioned for fluorescent *in situ* hybridization (FISH). DIG-labeled  
174 RNA probe of *chd* was synthesized and the FISH was performed according to the previous  
175 study (WELTEN *et al.* 2006). The signals were developed for about 25 minutes using Fluor™  
176 Tyramide reagent (Invitrogen). The images were taken under the Leica SP8 confocal  
177 microscope using.

178

179 *Reverse-transcription PCR*

180 Total RNA was isolated from unfertilized eggs and embryos at 256-cell stage, sphere  
181 stage, shield stage, bud stage and 24 hpf by using Trizol method. The RNA was reverse-  
182 transcribed with PrimeScript™ RT reagent Kit (Takara) and PCR analyzed with primers

183 *chd*-RT-F and *chd*-RT-R (Table 1). *b-actin* was used as the internal control.

184

#### 185 *Data Availability Statement*

186 Strains and plasmids are available upon request. The authors affirm that all data  
187 necessary for confirming the conclusions of the article are present within the article, figures,  
188 and tables.

189

## 190 **RESULTS**

191 *Mutants of chd and pou5f3 can rarely be obtained by conventional CRISPR/Cas9 knockout*  
192 *technology*

193 We have tried to knockout zebrafish genes *chd* and *pou5f3* using conventional  
194 CRISPR/Cas9 knockout technology. As expected, after injection of *cas9-UTRsv40* mRNA  
195 and *chd* gRNA, about 96.2% (204 against 212) embryos showed typical ventralization  
196 phenotype with enlarged blood island and decreased head size, just mimicking its  
197 morphants or the *chordino* mutants (SCHULTE-MERKER *et al.* 1997), which indicated the  
198 effectiveness and high penetrance of *chd* gRNA in zebrafish. We then analyzed the  
199 mutation efficiencies of the gRNA target sequence of *chd* in the WT like embryos (C1) and  
200 the mutant like embryos (C2). To our surprise, all the clones from the mutant type embryos  
201 showed to be indel (insertion or deletion) mutations of the *chd* target, while all the clones  
202 from the WT like embryos showed to be no mutation of the target sequence (Figure 1B).  
203 Therefore, in order to obtain the germline mutant carriers of *chd*, we could only raise the  
204 C2 embryos. However, those embryos showed extremely low survival rate during  
205 subsequent cultivation (Figure 1E). On the other hand, as to *pou5f3* gene, 71.7% (180/251)  
206 of the *cas9-UTRsv40* mRNA and *pou5f3* gRNA co-injected embryos showed serious  
207 developmental defects (C2) and 28.3% showed to be WT like (C1) at 30 hpf. Although the  
208 C2 embryos showed 100% mutation efficiency by sequencing analysis (Figure 1D), they  
209 could not survive to 2 dpf. Therefore, we focused on the rest C1 embryos, which showed  
210 a mutation efficiency of about 70%. Nevertheless, most of these *pou5f3* disrupted embryos  
211 could not survive to adulthood (Figure 1E). Therefore, we were unable to obtain enough  
212 F0 adults for screening of F1 knockout larval fish for both *chd* and *pou5f3*. To conclude,



213 the application of conventional CRISPR/Cas9 gene knockout technology has such  
214 obstacle and limitation to generate homozygous mutants of embryogenesis-essential  
215 (embryonic lethal) genes.

216

#### 217 *Optimization of PGCs mutagenesis and PGCT*

218 As it was difficult for us to obtain germline transmitters by using the aforementioned  
219 conventional method of CRISPR/Cas9 by co-injection of *cas9-UTRsv40* mRNA and gRNA  
220 for embryonic lethal genes, we then tried to utilize the technology of germline replacement  
221 by transplanting the mutated PGCs to PGCs-depleted embryos. To start with, we tried to  
222 optimize the efficiencies of PGCs mutagenesis and PGCT.

223 We first compared the mutation efficiency of gRNA target in PGCs and the somatic  
224 cells by using a transgenic line *Tg(piwi:egfp-UTRnos3)<sup>ihb327Tg</sup>*, which specifically labels the  
225 PGCs (YE *et al.* 2019b). When *cas9-UTRsv40* mRNA and *tcf7l1a* gRNA were co-injected  
226 into the *Tg(piwi:egfp-UTRnos3)<sup>ihb327Tg</sup>*, GFP-positive PGCs and GFP-negative somatic  
227 cells were sorted out for further mutation analysis (Figure 2A). To our surprise, the mutation  
228 efficiency of target sequence in PGCs was significantly lower than that in the somatic cells  
229 (Figure 2B), indicating that the genome of germline is somehow more resistant to  
230 Cas9/gRNA induced mutagenesis. We then co-injected *tcf7l1a* gRNA and *cas9-UTRnos3*  
231 mRNA which could stabilize the Cas9 expression in PGCs by the 3'UTR of *nos3*  
232 (KOPRUNNER *et al.* 2001). In contrast, PGCs-specifically expressed Cas9 could significantly  
233 increase the target mutation efficiency in PGCs while decrease the mutation efficiency in  
234 somatic cells (Figure 2C). Therefore, we utilized the *cas9-UTRnos3* mRNA injected  
235 embryos as the donor for PGCT in subsequent study.

236 In theory, the efficiency of PGCT relies on the PGCs number in the donor embryo,  
237 therefore it is important to increase the PGCs number of the donor embryo. The *buc* gene,  
238 which encodes a germplasm organizer, has been shown to be necessary and sufficient for  
239 germplasm formation and PGCs induction (BONTEMS *et al.* 2009; KRISHNAKUMAR *et al.*  
240 2018). In our recent study, we showed that overexpression of *buc* could significantly induce  
241 PGCs number and even promote female development in zebrafish (YE *et al.* 2019b).  
242 Therefore, we speculated that whether induction of additional PGCs by injecting *buc*-

243 *UTRsv40* mRNA into donor embryos would improve success rate of PGCT. As expected,  
244 *buc* mRNA injection could induce additional PGCs in donor embryos (Figure 2D). The  
245 embryos co-injected with *dnd*\_MO showed all PGCs invisible, indicating the complete  
246 elimination of endogenous PGCs of the host embryos (Figure 2E), and embryos receiving  
247 successful PGCT showed GFP-positive PGCs at 35 hpf (Figure 2F). We screened the  
248 PGCs fluorescent embryos after PGCT and calculated the success rate of PGCT by  
249 dividing the number of PGCs-positive embryos against the number of embryos  
250 manipulated. The results showed that co-injection of *buc-UTRsv40* mRNA into the donor  
251 embryos could even double the success rate of PGCT from 14.2% to 27.2% (Figure 2 G).  
252 Therefore, we utilized the *buc* overexpressed embryos as transplantation donors to  
253 improve the efficiency of PGCT.

254

#### 255 *Efficient generation of maternal zygotic mutants of tcf7l1a (MZtcf7l1a)*

256 As we optimized the efficiencies of PGCs-targeted Cas9/gRNA and PGCT, we then  
257 tried to generate MZ mutant of certain genes. The first gene for a test is *tcf7l1a*, which  
258 maternal zygotic mutants showed to be headless while zygotic mutants did not show any  
259 visible defects (Kim *et al.* 2000). By utilizing the optimized approach of PGCs-targeted  
260 mutagenesis and PGCT (Figure 3), we successfully obtained 18 transplanted adults, in  
261 which 4 were females and 14 were males. All the females were fertile, while only 7 of the  
262 males were fertile. By contrast, all the embryos with PGCs depleted host embryos  
263 developed into infertile males. By an outcross test, we identified the mutation  
264 efficiencies of gametes of each PGCs transplanted fish, in which the female #3 and male  
265 #7 gave the highest mutation efficiencies (100% for both) among each group (Figure 4A,  
266 Supplemental Figure 1). This indicates that target gene mutated homozygous mutants  
267 could directly be obtained just at F1 generation.

268 Thereafter, the female #3 and male #7 were crossed and their offspring were  
269 phenotypically analyzed. As expected, majority (C3 73.4%) of the offspring showed typical  
270 phenotype of headless, while the minority of them (C2 24.2%) showed smaller eyes (Figure  
271 4B). We further analyzed gene expression of the mutant embryos and found that *tcf7l1a*  
272 scarcely expressed in the mutant embryos throughout the early development, indicating

273 that non-sense mediated mRNA decay occurred in the embryos (Figure 4C). In addition,  
274 WISH analysis showed that the expression of *emx1*, a marker of telencephalon,  
275 disappeared while *krox20*, a marker for rhombomere 3 and 5, were nearly unaffected in  
276 the mutants at early-somite stage, and the telencephalon and eyes labeled by *six3b*  
277 disappeared in the mutant embryos at 24hpf (Figure 4D). When compared WT embryos,  
278 the expression of neural crest marker *foxd3* in the mutant embryos showed a slight  
279 increase, probably due to the increased zygotic Wnt/ $\beta$ -catenin activity (LEWIS *et al.* 2004).  
280 All these results undoubtedly proved that MZ mutants of *tcf7l1a* gene could be generated  
281 efficiently using combined CRISPR/Cas9 with PGCT.

282

### 283 *Efficient generation of MZpou5f3 at F1 generation*

284 We then applied this technology to generate the maternal zygotic mutants of *pou5f3*,  
285 an essential gene for early embryogenesis with both maternal and zygotic expression  
286 (REIM *et al.* 2004; REIM AND BRAND 2006). In total, 10 fertile F0 adults were obtained  
287 following application of combined CRISPR/Cas9 with PGCT. As shown in Figure 5A, the  
288 mutation efficiency of their gametes from female #1 and male #2 could reach as high as  
289 100% (Supplemental Figure 2).

290 Subsequently, the female #1 was crossed with male #2 and the offspring were used  
291 for phenotypical analysis. The incrossed embryos showed gastrulation defects and severe  
292 dorsalization at 24 hpf (Figure 5B), mimicking the previously reported mutant phenotype of  
293 MZ*pou5f3* (REIM *et al.* 2004; REIM AND BRAND 2006). The expression analysis of several  
294 genes was conducted to confirm the phenotypes of F0-incrossed MZ*pou5f3*. Firstly, *pou5f3*  
295 showed barely expression in mutants during early embryogenesis compared to its high  
296 expression level in WT (Figure 5C). Secondly, compared to WT at shield stage, the  
297 expression of *chd* (labeling dorsal organizer) expanded ventrally within the germ ring and  
298 *eve1* (a ventral mesoderm marker) was strongly reduced in the mutants (Figure 5D).  
299 Moreover, expression of *sox32* and *sox17*, the markers for endoderm development were  
300 undetectable in the mutant embryos. Notably, *myoD* was expressed in WT somites at the  
301 6-somites stage, while in mutants its expression was displaced and fused ventrally. Lastly,  
302 *ntl* was straightly expressed in the notochord in WT embryos, but its expression was

303 variably split in mutant embryos. All the results indicate that the F1 embryos were  
304 seriously dorsalized described as previous (REIM AND BRAND 2006). Therefore, the  
305 *MZpou5f3* was successfully obtained at F1 generation using combination of CRISPR/Cas9  
306 and PGCT, which proved its feasibility for efficient generation of MZ mutants of zygotic  
307 essential genes with maternal and zygotic expression.

308

#### 309 *Maternal contribution of chd as revealed by MZchd phenotypical analysis*

310 Lastly, we tried to utilize this approach to probe into the function of some embryonic  
311 essential genes with zygotic expression by generating novel maternal zygotic mutants. *chd*,  
312 encodes a major antagonist of BMP signaling in early development, and both mutation  
313 analysis and morpholino-mediated knockdown studies revealed its essential role for dorsal  
314 development (SCHULTE-MERKER *et al.* 1997; NASEVICIUS AND EKKER 2000). However, a  
315 previous study showed slight expression of *chd* expression at 8-cell stage (BRANAM *et al.*  
316 2010), and our study using FISH on ovary sections and RT-PCR analysis of the oocyte  
317 further demonstrated the maternal expression of *chd* in the zebrafish oocyte (Figure 6A,  
318 B). Therefore, whether there is a maternal contribution of Chd activity needs to be  
319 answered, by generating the MZ*chd* and comparing the MZ*chd* phenotype with its zygotic  
320 mutants.

321 By using the optimized PGCs-targeted CRISPR/Cas9 and PGCT approach, we  
322 obtained 13 fertile transplanted adults. By direct sequencing of the target site from the  
323 genome of the test-crossed embryos, we found that 8 (2♀ 6♂) out of the 13 (5♀ 8♂)  
324 positive transplants could produce *chd* mutant gametes, while female #1 and male #1 gave  
325 the highest mutation rates (Figure 6C). Although one transplanted adult could usually  
326 produce more than one type of mutations (Supplemental Figure 3), about 63.3 % (19/30)  
327 of the mutation types resulted from microhomology-mediated end joining (MMEJ), a  
328 mechanism of DNA repair for double strand breaks (DSB) which facilitates the repair of  
329 DNA double-strand breaks in zebrafish early embryos (HE *et al.* 2015; THYME AND SCHIER  
330 2016).

331 In the next step, the two F0 adults (♀ #1 and ♂ #1) with mutated gametes were  
332 incrossed and the F1 embryos were obtained. As expected, about 45.3% (169/373) of the

333 embryos showed ventralization phenotype (C2 and C3, Figure 6D). Among the embryos  
334 showing ventralization, about 1/3 (50/169) of the embryos showed severe ventralization  
335 phenotype (C3), with no forebrain and eyes and extremely expanded blood island and  
336 folded ventral tail fin. All the embryos showing C2 or C3 phenotype were randomly sampled  
337 for genetic identification and all the samples showed to be genetically homozygotes with  
338 the same or different indels at the same allele. We carefully compared the C2 and C3  
339 phenotypes with the zygotic mutants resulting from incross of *chd*<sup>#250/+</sup> (Figure 6E), and  
340 found that C3 embryos of the MZ*chd* generated in the present study were much more  
341 severely ventralized. This strongly suggest that the maternally provided *chd* mRNA has  
342 BMP antagonistic function in zebrafish early development and the PGCs-targeted  
343 mutagenesis and PGCT approach may be used to unveil the novel function of some  
344 classical genes.

345

## 346 **DISCUSSION**

347 Gene targeting technologies are considered appropriate approaches to investigate  
348 gene functions. Generally, high dosage of the gene targeting vectors or RNAs will improve  
349 mutation efficiencies, but they have potentially led to dysplastic embryos, especially when  
350 the target gene is essential for embryogenesis or organogenesis. Nevertheless, to  
351 overcome this conflict, PGCs as cluster of early embryonic cells that differ from somatic  
352 cells which transmit genetic materials to next generation, could be an optional target cell  
353 type for genetic manipulation. In the present study, we have established a high-efficient  
354 method for generating maternal zygotic mutants of different genes, by combining the  
355 PGCs-targeted CRISPR/Cas9 technology and optimized PGCs transplantation in  
356 zebrafish.

357 In previous study, it has been reported that although the mutation efficiency generated  
358 by common CRISPR/Cas9 was achieved up to 50%, there was only 11% germline  
359 transmission efficiency in the progeny (HRUSCHA *et al.* 2013). This indicates that high  
360 mutation efficiency of the whole embryos generated by conventional method of  
361 CRISPR/Cas9 suffers from low mutation efficiency in germline, leading to waste of time  
362 and energy in the screening of mutants. In this study, we thoroughly analyzed and

363 compared the mutation efficiencies of somatic cells and PGCs resulting from ubiquitous  
364 overexpression of Cas9 and gRNA. While for the first time, we revealed that the mutation  
365 efficiency in PGCs is much lower than that in the somatic cells. Therefore, in the  
366 conventional Cas9/gRNA injected study, the mutation efficiency evaluated at the whole  
367 embryo level should have been over-estimated, if we value the germline transmission  
368 efficiency. In this study, high dosage of *cas9-UTRnos3* mRNA and gRNAs were co-injected  
369 into zebrafish embryos and we showed that the mutation rate in PGCs became significantly  
370 higher than that in the somatic cells. When the Cas9/gRNA targeted PGCS were used as  
371 PGCT donors, the PGCs transplanted host fish could successfully produce mutated  
372 gametes with the efficiencies as high as 100%. On the other hand, by induction of ectopic  
373 mutated PGCs in the donor embryos by overexpression of *buc*, we have substantially  
374 improved the efficiency of successful PGCT, which has shown to be a labor-extensive and  
375 skill-sensitive technology in previous studies (CIRUNA *et al.* 2002b; SAITO *et al.* 2008a).

376 In zebrafish, it is known that depletion of PGCs in early embryos leads to sterile males,  
377 and sufficient amount of PGCs is required for female development (TZUNG *et al.* 2015).  
378 Therefore, when conducting PGCs transplantation in zebrafish embryos, high amount of  
379 donor-derived PGCs should be transplanted into PGCs-depleted host embryos, in order to  
380 obtain transplanted females. In the present study, as *buc*-overexpression was used to  
381 promote PGCs fate in donor embryos (YE *et al.* 2019b), we were able to obtain fertile  
382 females with relatively high rate in the PGCs transplanted fish. In one case of *pou5f3*,  
383 nevertheless, we only obtained one fertile female fish in the PGCs-transplanted adults. In  
384 the future studies, moderate exposure of the embryos in estradiol at proper time may be  
385 an effective way to increase female numbers of the transplanted adults (BRION *et al.* 2004;  
386 SAITO *et al.* 2008b).

387 The highly mutated PGCs thus gave rise to genetically homozygous oogonia, and later  
388 maternally mutant oocytes without any contribution of the maternal mRNA of the target  
389 gene. Once mated with a homozygous male, the MZ mutants could be obtained just at F1  
390 generation, thus providing a novel strategy for function studies of embryonic essential  
391 genes with maternal expression. In this study, we not only obtained the MZ mutants of  
392 *tcf7l1a*, a gene only showing phenotype when it is maternal-zygotically mutated, but also

393 generated the maternal zygotic mutants of *pou5f3*, which zygotic mutants could not survive  
394 to adulthood. More importantly, by generating MZ mutants of *chd*, a gene essential for  
395 dorsal organizer development, we have unveiled the novel function of its maternally  
396 inherited mRNA. To our knowledge, this is the first report of combination of PGCs-targeted  
397 mutagenesis method with PGCs transplantation to efficiently generate MZ mutants of  
398 zebrafish at F1 generation. In the future, the method may be utilized to functionally analyze  
399 maternally-expressed genes in large-scale knockout project.

400

#### 401 **ACKNOWLEDGEMENTS**

402 We sincerely thank Mrs. Ming Li at Institute of Hydrobiology, CAS for providing  
403 technical assistance in the early stage of PGCT. We also thank Kuoyu Li at the China  
404 Zebrafish Resource Center (CZRC) for zebrafish rearing. This work was supported by the  
405 National Natural Science Foundation of China (No. 31721005, 31671501 and 31222052),  
406 the Youth Innovation Association of CAS, and the State Key Laboratory of Freshwater  
407 Ecology and Biotechnology (grant No. 2019FBZ05).

408

409

410

#### 411 **REFERENCES**

- 412 Bassett, A. R., C. Tibbit, C. P. Ponting and J. L. Liu, 2013 Highly efficient targeted mutagenesis of  
413 *Drosophila* with the CRISPR/Cas9 system. *Cell Rep* 4: 220-228.
- 414 Bontems, F., A. Stein, F. Marlow, J. Lyautey, T. Gupta *et al.*, 2009 Bucky Ball Organizes Germ Plasm  
415 Assembly in Zebrafish. *Current Biology* 19: 414-422.
- 416 Branam, A. M., G. G. Hoffman, F. Pelegri and D. S. Greenspan, 2010 Zebrafish Chordin-like and Chordin  
417 Are Functionally Redundant in Regulating Patterning of the Dorsoventral Axis. *Dev Biol*.
- 418 Brion, F., C. R. Tyler, X. Palazzi, B. Laillet, J. M. Porcher *et al.*, 2004 Impacts of 17 beta-estradiol,  
419 including environmentally relevant concentrations, on reproduction after exposure during  
420 embryo-larval-, juvenile- and adult-life stages in zebrafish (*Danio rerio*). *Aquatic Toxicology*  
421 68: 193-217.
- 422 Burgess, S., G. Reim, W. B. Chen, N. Hopkins and M. Brand, 2002 The zebrafish *spiel-ohne-grenzen*  
423 (*spg*) gene encodes the POU domain protein Pou2 related to mammalian Oct4 and is  
424 essential for formation of the midbrain and hindbrain, and for pre-gastrula morphogenesis.  
425 *Development* 129: 905-916.
- 426 Chang, N., C. Sun, L. Gao, D. Zhu, X. Xu *et al.*, 2013 Genome editing with RNA-guided Cas9 nuclease in  
427 zebrafish embryos. *Cell Res* 23: 465-472.

- 428 Ciruna, B., G. Weidinger, H. Knaut, B. Thisse, C. Thisse *et al.*, 2002a Production of maternal-zygotic  
429 mutant zebrafish by germ-line replacement. Proceedings of the National Academy of  
430 Sciences of the United States of America 99: 14919-14924.
- 431 Ciruna, B., G. Weidinger, H. Knaut, B. Thisse, C. Thisse *et al.*, 2002b Production of maternal-zygotic  
432 mutant zebrafish by germ-line replacement. Proc Natl Acad Sci U S A 99: 14919-14924.
- 433 Dosch, R., D. S. Wagner, K. A. Mintzer, G. Runke, A. P. Wiemelt *et al.*, 2004 Maternal control of  
434 vertebrate development before the midblastula transition: Mutants from the zebrafish I.  
435 Developmental Cell 6: 771-780.
- 436 Hammerschmidt, M., F. Pelegri, M. C. Mullins, D. A. Kane, F. J. M. vanEeden *et al.*, 1996 dino and  
437 mercedes, two genes regulating dorsal development in the zebrafish embryo. Development  
438 123: 95-102.
- 439 He, M. D., F. H. Zhang, H. L. Wang, H. P. Wang, Z. Y. Zhu *et al.*, 2015 Efficient ligase 3-dependent  
440 microhomology-mediated end joining repair of DNA double-strand breaks in zebrafish  
441 embryos. Mutation Research-Fundamental and Molecular Mechanisms of Mutagenesis 780:  
442 86-96.
- 443 Hruscha, A., P. Krawitz, A. Rechenberg, V. Heinrich, J. Hecht *et al.*, 2013 Efficient CRISPR/Cas9 genome  
444 editing with low off-target effects in zebrafish. Development 140: 4982-4987.
- 445 Hwang, W. Y., Y. F. Fu, D. Reyon, M. L. Maeder, S. Q. Tsai *et al.*, 2013 Efficient genome editing in  
446 zebrafish using a CRISPR-Cas system. Nature Biotechnology 31: 227-229.
- 447 Kim, C. H., T. Oda, M. Itoh, D. Jiang, K. B. Artinger *et al.*, 2000 Repressor activity of Headless/Tcf3 is  
448 essential for vertebrate head formation. Nature 407: 913-916.
- 449 Kimmel, C. B., W. W. Ballard, S. R. Kimmel, B. Ullmann and T. F. Schilling, 1995 Stages of embryonic  
450 development of the zebrafish. Dev Dyn 203: 253-310.
- 451 Kopranner, M., C. Thisse, B. Thisse and E. Raz, 2001 A zebrafish nanos-related gene is essential for the  
452 development of primordial germ cells. Genes Dev 15: 2877-2885.
- 453 Krishnakumar, P., S. Riemer, R. Perera, T. Lingner, A. Goloborodko *et al.*, 2018 Functional equivalence of  
454 germ plasm organizers. PLoS Genet 14: e1007696.
- 455 Lewis, J. L., J. Bonner, M. Modrell, J. W. Ragland, R. T. Moon *et al.*, 2004 Reiterated Wnt signaling  
456 during zebrafish neural crest development. Development 131: 1299-1308.
- 457 Nasevicius, A., and S. C. Ekker, 2000 Effective targeted gene 'knockdown' in zebrafish. Nature Genetics  
458 26: 216-220.
- 459 Patton, E. E., and L. I. Zon, 2001 The art and design of genetic screens: Zebrafish. Nature Reviews  
460 Genetics 2: 956-966.
- 461 Reim, G., and M. Brand, 2006 Maternal control of vertebrate dorsoventral axis formation and epiboly  
462 by the POU domain protein Spg/Pou2/Oct4. Development 133: 2757-2770.
- 463 Reim, G., T. Mizoguchi, D. Y. Stainier, Y. Kikuchi and M. Brand, 2004 The POU domain protein Spg  
464 (Pou2/Oct4) is essential for endoderm formation in cooperation with the HMG domain  
465 protein Casanova. Developmental Cell 6: 91-101.
- 466 Saito, T., R. Goto-Kazeto, K. Arai and E. Yamaha, 2008a Xenogenesis in teleost fish through generation  
467 of germ-line chimeras by single primordial germ cell transplantation. Biol Reprod 78: 159-  
468 166.
- 469 Saito, T., R. Goto-Kazeto, K. Arai and E. Yamaha, 2008b Xenogenesis in teleost fish through generation  
470 of germ-line chimeras by single primordial germ cell transplantation. Biology of Reproduction  
471 78: 159-166.



- 472 Schulte-Merker, S., K. J. Lee, A. P. McMahon and M. Hammerschmidt, 1997 The zebrafish organizer  
473 requires chordin. *Nature* 387: 862-863.
- 474 Sun, Y. H., 2017 Genome editing opens a new era for physiological study and directional breeding of  
475 fishes. *Science Bulletin* 62: 157-158.
- 476 Thyme, S. B., and A. F. Schier, 2016 Polq-Mediated End Joining Is Essential for Surviving DNA Double-  
477 Strand Breaks during Early Zebrafish Development. *Cell Rep* 15: 707-714.
- 478 Tzung, K. W., R. Goto, J. M. Saju, R. Sreenivasan, T. Saito *et al.*, 2015 Early depletion of primordial germ  
479 cells in zebrafish promotes testis formation. *Stem Cell Reports* 4: 61-73.
- 480 Tzur, Y. B., A. E. Friedland, S. Nadarajan, G. M. Church, J. A. Calarco *et al.*, 2013 Heritable custom  
481 genomic modifications in *Caenorhabditis elegans* via a CRISPR-Cas9 system. *Genetics* 195:  
482 1181-1185.
- 483 Veil, M., M. A. Schaechtle, M. J. Gao, V. Kirner, L. Buryanova *et al.*, 2018 Maternal Nanog is required for  
484 zebrafish embryo architecture and for cell viability during gastrulation. *Development* 145.
- 485 Wagner, D. S., R. Dosch, K. A. Mintzer, A. P. Wiemelt and M. C. Mullins, 2004 Maternal control of  
486 development at the midblastula transition and beyond: Mutants from the zebrafish II.  
487 *Developmental Cell* 6: 781-790.
- 488 Wei, C. Y., H. P. Wang, Z. Y. Zhu and Y. H. Sun, 2014 Transcriptional factors Smad1 and Smad9 act  
489 redundantly to mediate zebrafish ventral specification downstream of Smad5. *J Biol Chem*  
490 289: 6604-6618.
- 491 Weidinger, G., J. Stebler, K. Slanchev, K. Dumstrei, C. Wise *et al.*, 2003 dead end, a novel vertebrate  
492 germ plasm component, is required for zebrafish primordial germ cell migration and survival.  
493 *Current Biology* 13: 1429-1434.
- 494 Welten, M. C. M., S. B. d. Haan, N. v. d. Boogert, J. N. Noordermeer, G. E. M. Lamers *et al.*, 2006  
495 ZebraFISH: Fluorescent In Situ Hybridization Protocol and Three-Dimensional Imaging of Gene  
496 Expression Patterns. *Zebrafish* 3: 465-476.
- 497 Xiong, F., Z. Q. Wei, Z. Y. Zhu and Y. H. Sun, 2013 Targeted Expression in Zebrafish Primordial Germ  
498 Cells by Cre/loxP and Gal4/UAS Systems. *Mar Biotechnol (NY)* 15: 526-539.
- 499 Ye, D., L. Zhu, Q. Zhang, F. Xiong, H. Wang *et al.*, 2019a Abundance of Early Embryonic Primordial  
500 Germ Cells Promotes Zebrafish Female Differentiation as Revealed by Lifetime Labeling of  
501 Germline. *21*: 217-228.
- 502 Ye, D., L. Zhu, Q. Zhang, F. Xiong, H. Wang *et al.*, 2019b Abundance of Early Embryonic Primordial  
503 Germ Cells Promotes Zebrafish Female Differentiation as Revealed by Lifetime Labeling of  
504 Germline. *Mar Biotechnol (NY)* 21: 217-228.
- 505 Zhang, F., H. Wang, S. Huang, F. Xiong, Z. Zhu *et al.*, 2016a [A comparison of the knockout efficiencies  
506 of two codon-optimized Cas9 coding sequences in zebrafish embryos]. *Yi Chuan* 38: 144-154.
- 507 Zhang, F. H., H. P. Wang, S. Y. Huang, F. Xiong, Z. Y. Zhu *et al.*, 2016b [A comparison of the knockout  
508 efficiencies of two codon-optimized Cas9 coding sequences in zebrafish embryos]. *Yi Chuan*  
509 38: 144-154.
- 510

511 **Figure Legends:**

512 **Figure 1 Poor survival of the embryos after Cas9/gRNA injection to knockout *chd***  
513 **and *pou5f3***

514 (A) Statistics on different phenotypes of the embryos after 400 pg *cas9-UTRsv40* mRNA  
515 and 80 pg gene-specific gRNA injection to knock out *chd*. C1: wild-type (WT) like; C2:  
516 ventralization.

517 (B) Mutation rates of embryos at corresponding phenotypes after CRISPR/Cas9 knockout  
518 of *chd*. n: number of clones sequenced.

519 (C) Statistics on different phenotypes of the embryos after 400pg *cas9-UTRsv40* mRNA  
520 and 80pg gene-specific gRNA injection to knock out *pou5f3*. C1: WT like; C2: dorsalization.

521 (D) Mutation rates of embryos at corresponding phenotypes after CRISPR/Cas9 knockout  
522 of *pou5f3*. n: number of clones sequenced.

523 (E) Statistics on survival rates of the embryos after 400pg *cas9-UTRsv40* mRNA and 80pg  
524 gene-specific gRNA injection to knock out *chd* and *pou5f3* at 0, 2, 14, 60 dpf.

525

526 **Figure 2 Optimization of PGCs-targeted mutagenesis and PGCs transplantation**

527 (A) Representative image of pre- and post-sorting of PGCs from a transgenic line of  
528 *Tg(piwil1:egfp-UTRnos3)* at 2dpf.

529 (B) Mutation efficiencies were calculated in the somatic cells and PGCs after co-injection  
530 of *cas9-UTRsv40* mRNA and gRNA. Parallel experiments were done for three times.  
531 P<0.01.

532 (C) Mutation efficiencies were calculated in the somatic cells and PGCs after co-injection  
533 of *cas9-UTRnos3* mRNA and gRNA. Parallel experiments were done for three times.  
534 P<0.01.

535 (D) *buc* mRNA induced ectopic PGCs of donor embryos. Purple, orange and pink represent  
536 larva with less, moderate and many PGCs respectively.

537 (E) Representative image showing a host embryo co-injected with 200pg *GFP-UTRnos3*  
538 mRNA and 100nM *dnd*\_MO show complete loss of endogenous PGCs.

539 (F) Representative image showing a PGCs positive transplanted embryo screened at 35

540 hpf. Arrows indicate the fluorescent PGCs from the donor embryos.

541 (G) The success rate of PGCT, as indicated by PGCs-positive transplanted embryos at 35

542 hpf, was significantly increased by injection of *buc* mRNA into the donor embryos. The

543 experiment was replicated for three times.  $P < 0.01$

544

545 **Figure 3 Schematic workflow represents process of the optimized procedure of**

546 **PGCs-targeted CRISPR/Cas9 and transplantation of induced PGCs**

547

548 **Figure 4 Efficient generation of MZ mutants of *tcf7l1a* by combination of**

549 **CRISPR/Cas9 and PGCT**

550 (A) Mutation efficiencies of gametes of each mutated positive F0 adult fish (4 ♀, 7 ♂).

551 (B) The phenotypes of F1 offspring crossed by female #3 and male #7. C1 shows the WT

552 like phenotype, C2 shows smaller eyes, C3 shows complete loss of eyes.

553 (C) *tcf7l1a* was barely expressed in mutants during early embryogenesis, compared to its

554 high expression level in WT.

555 (D) The marker of telencephalon *emx1*, was not expressed in mutant embryos at early-

556 somite stage; *krox20*, the marker for midbrain and hindbrain, was normally expressed in

557 the mutants at early-somite stage; the expression of neural crest marker *foxd3* was slightly

558 increased in mutants at early-somite stage; the expression of *six3b* at telencephalon and

559 eyes was strongly decreased in the mutant embryos at 24 hpf.

560

561 **Figure 5 Efficient generation of MZ mutants of *pou5f3* by combination of**

562 **CRISPR/Cas9 and PGCT**

563 (A) Mutation efficiencies of gametes of each mutated positive F0 adult fish (1 ♀, 9 ♂).

564 (B) The phenotypes of F1 offspring crossed by female #1 and male #2 from sphere stage

565 to 24 hpf. Note that the germ ring of mutant is thicker than the WT at shield stage, the

566 epiboly is seriously affected during gastrulation, and a cluster of cells piles on the top of

567 the dorsum (see LV, lateral view; AV, anterior view; DV, dorsal view) at 24 hpf.

568 (C) *pou5f3* was barely expressed in mutants, compared to its high expression in WT.

569 (D) The expression of *chd* was expanded ventrally within the germ ring in mutants,  
570 compared to WT; *eve1* was strongly reduced in mutants; *sox32* and *sox17*, the markers  
571 for endoderm, were undetectable in mutant embryos; the expression of *myoD* was  
572 displaced and fuses ventrally in the mutant embryos; the expression of *ntl* was variably  
573 splitted in mutant embryos, in comparison with its straight expression in the notochord in  
574 WT embryos.

575

576 **Figure 6 Analysis of MZ*chd* generated by combination of CRISPR/Cas9 and PGCT**

577 (A) The fluorescent RNA *in situ* hybridization of *chd* on cryosection of zebrafish ovary.

578 (B) RT-PCR analysis of *chd* during early development, *b-actin* was used as the internal  
579 control.

580 (C) Mutation efficiencies of gametes of each mutated positive F0 adult fish (2 ♀, 6 ♂).

581 (D) The phenotypes of F1 offspring incrossed by female #1 and male #1. C1 shows similar  
582 phenotype of WT, C2 shows smaller eyes and enlarged blood island, C3 shows severe  
583 head defects and tail blood island enlargement.

584 (E) The phenotypes of F1 offspring incrossed by heterozygotes of *chd*<sup>tt250/+</sup> mutants. C1  
585 shows the WT like phenotype, C2 shows smaller eyes and enlarged blood island, a typical  
586 phenotype of zygotic mutant of *chd*.

587

588 **Table 1. Primers used in the present study**

| Primers                 | Sequences (5' to 3')                                          | usage                            |
|-------------------------|---------------------------------------------------------------|----------------------------------|
| <i>chd</i> -Cas9-F3     | ATCCATCAATCCATTATCTT                                          |                                  |
| <i>chd</i> -Cas9-R3     | TGGTCTGTGAACACTGCC                                            |                                  |
| <i>tcf7l1a</i> -Cas9-F1 | TTCTAACCTCCACAGTCGC                                           | for amplifying                   |
| <i>tcf7l1a</i> -Cas9-R1 | GCTTCCGCAAAGTATTCC                                            | target sites                     |
| <i>pou5f3</i> -Cas9-F1  | GCAAGGTGGCGACTTTACG                                           |                                  |
| <i>pou5f3</i> -Cas9-R1  | CAGAGATGGGGATGAAGCG                                           |                                  |
| <i>tcf7l1a</i> -gRNA-1  | TGTAATACGACTCACTATAggaggaggaggatgat<br>gacctGTTTTAGAGCTAGAAAT |                                  |
| <i>pou5f3</i> -gRNA-1   | TGTAATACGACTCACTATAgggtgaactactacacg<br>ccaGTTTTAGAGCTAGAAAT  | for amplifying<br>gRNA templates |
| <i>chd</i> -gRNA-3      | TGTAATACGACTCACTATAggattaccagctgctggt<br>ggGTTTTAGAGCTAGAAAT  |                                  |
| gRNA-RP                 | AAAAAAGCACCGACTCGGTGCCAC                                      |                                  |
| <i>chd</i> -RT-F        | TCCGTCCAGACTGAAGGT                                            | RT-PCR for <i>chd</i>            |
| <i>chd</i> -RT-R        | GAAGACAGCAGAGCCCAC                                            |                                  |

589

**A*****cas9-UTRsv40* mRNA + *chd* gRNA**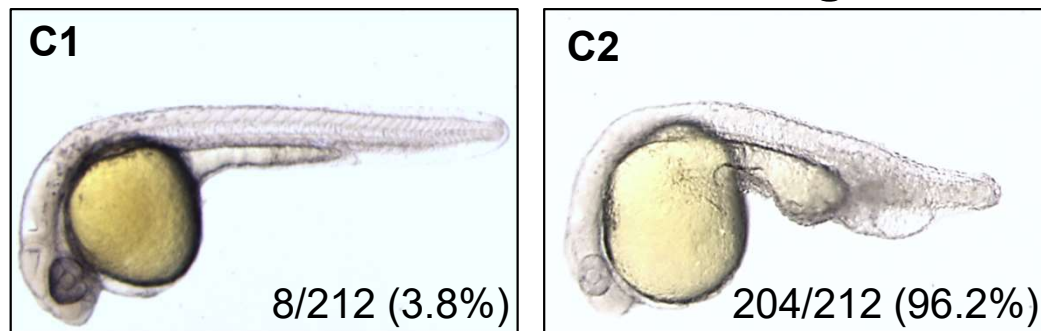

bioRxiv preprint doi: <https://doi.org/10.1101/693853>; this version posted July 5, 2019. The copyright holder for this preprint (which was not certified by peer review) is the author/funder. All rights reserved. No reuse allowed without permission.

**B**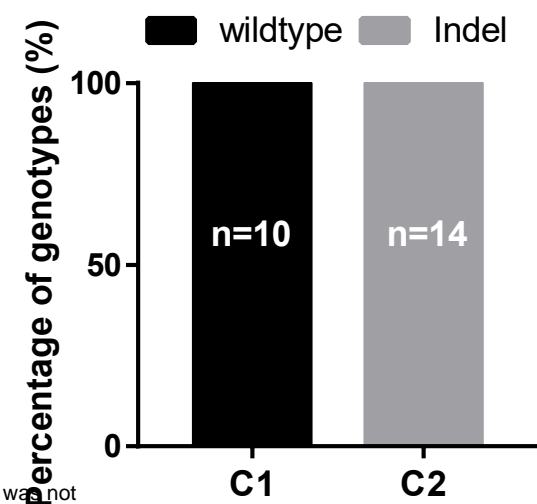**C*****cas9-UTRsv40* mRNA + *pou5f3* gRNA**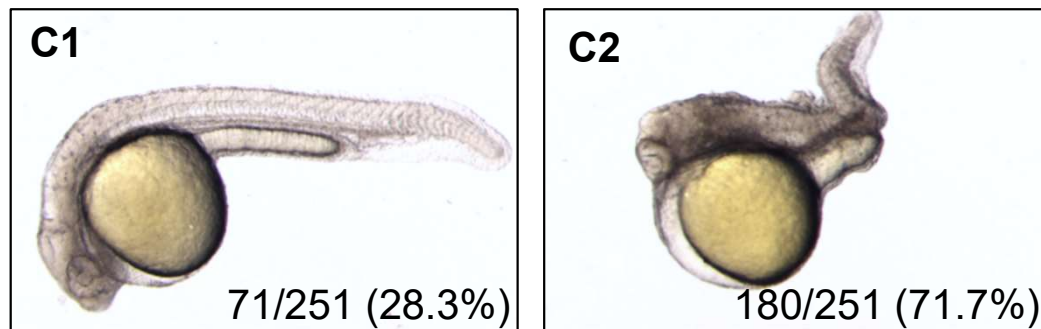**D**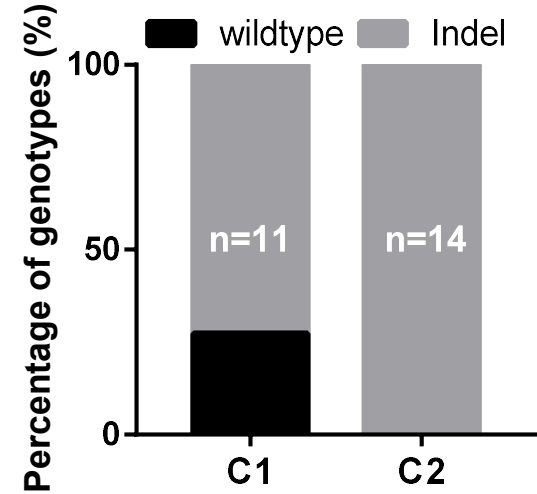**E**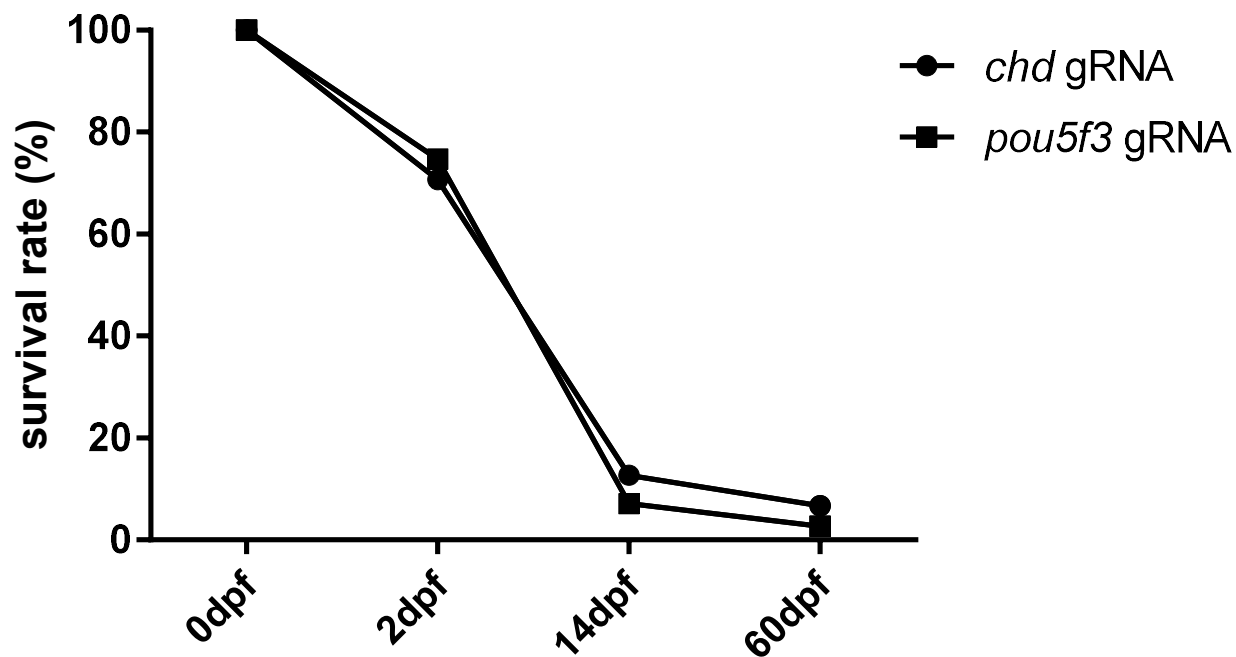

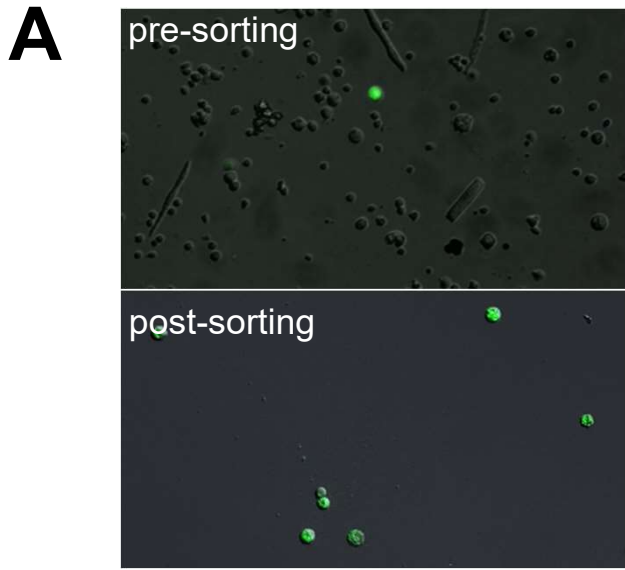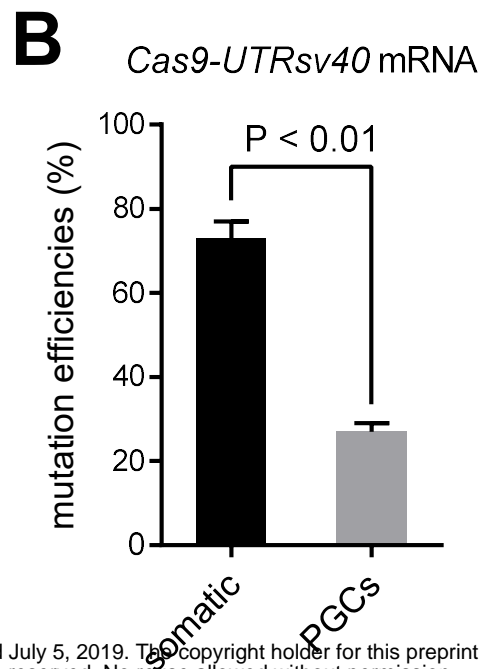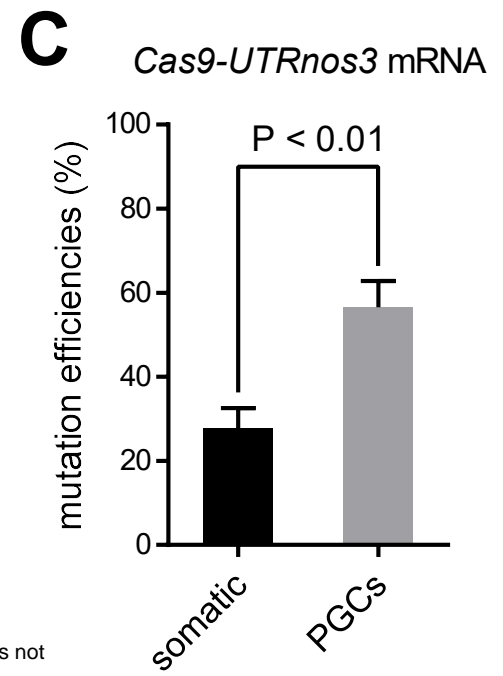

bioRxiv preprint doi: <https://doi.org/10.1101/693853>; this version posted July 5, 2019. The copyright holder for this preprint (which was not certified by peer review) is the author/funder. All rights reserved. No reuse allowed without permission.

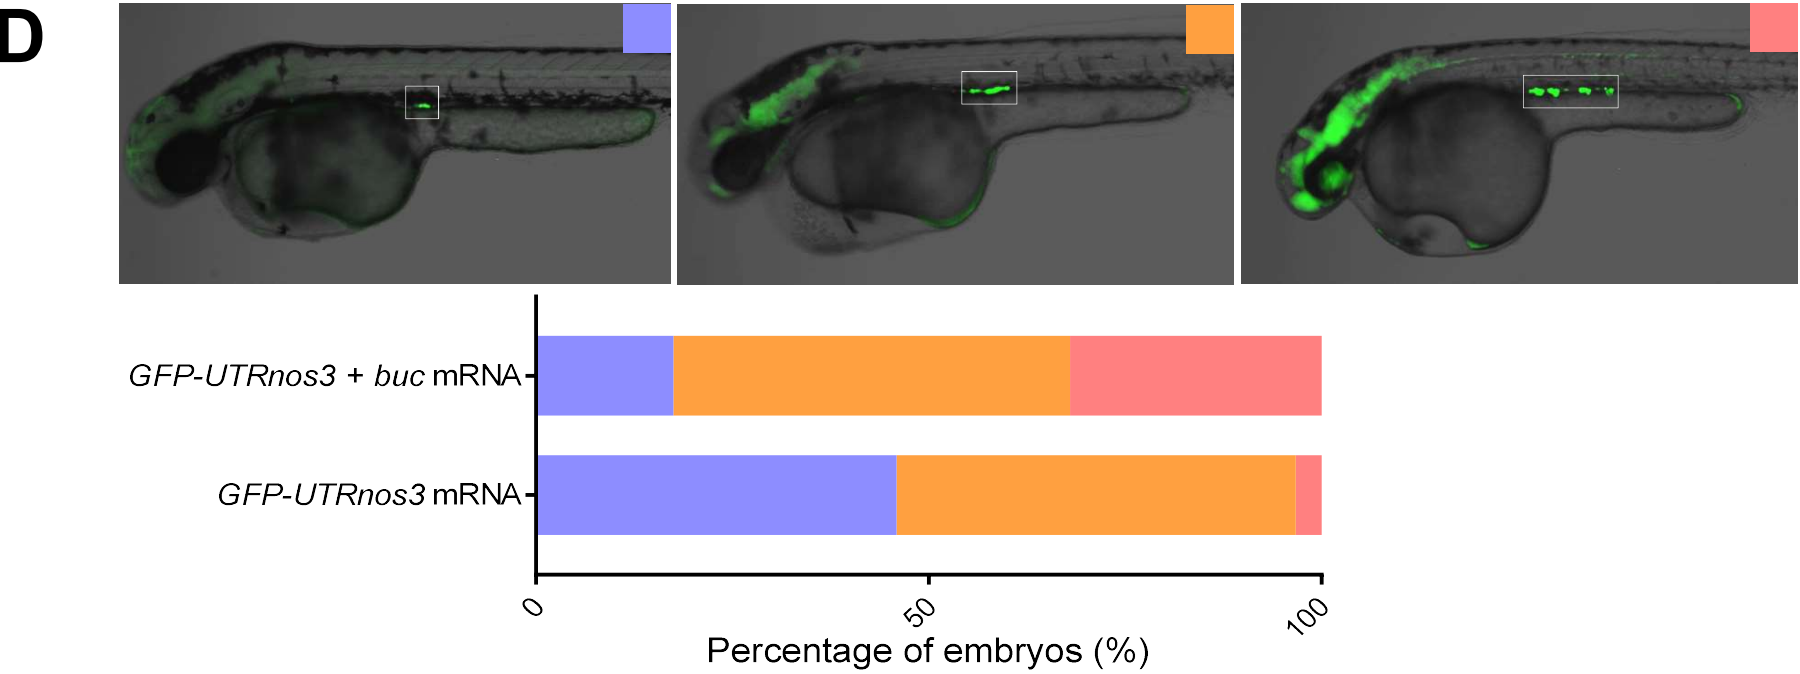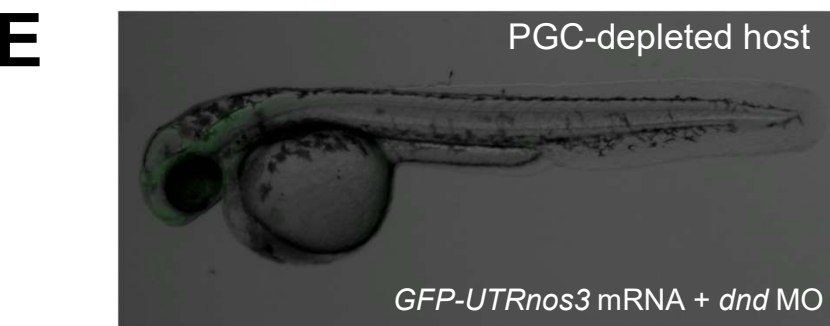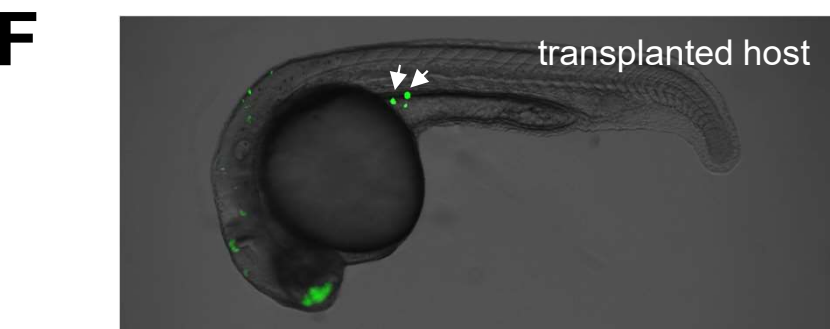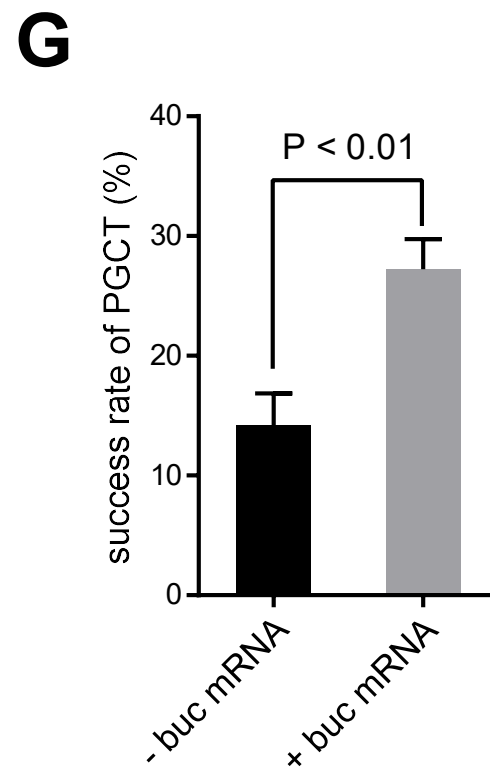

**cas9-UTRnos3** mRNA + gRNA  
+ **GFP-UTRnos3** mRNA + **buc** mRNA

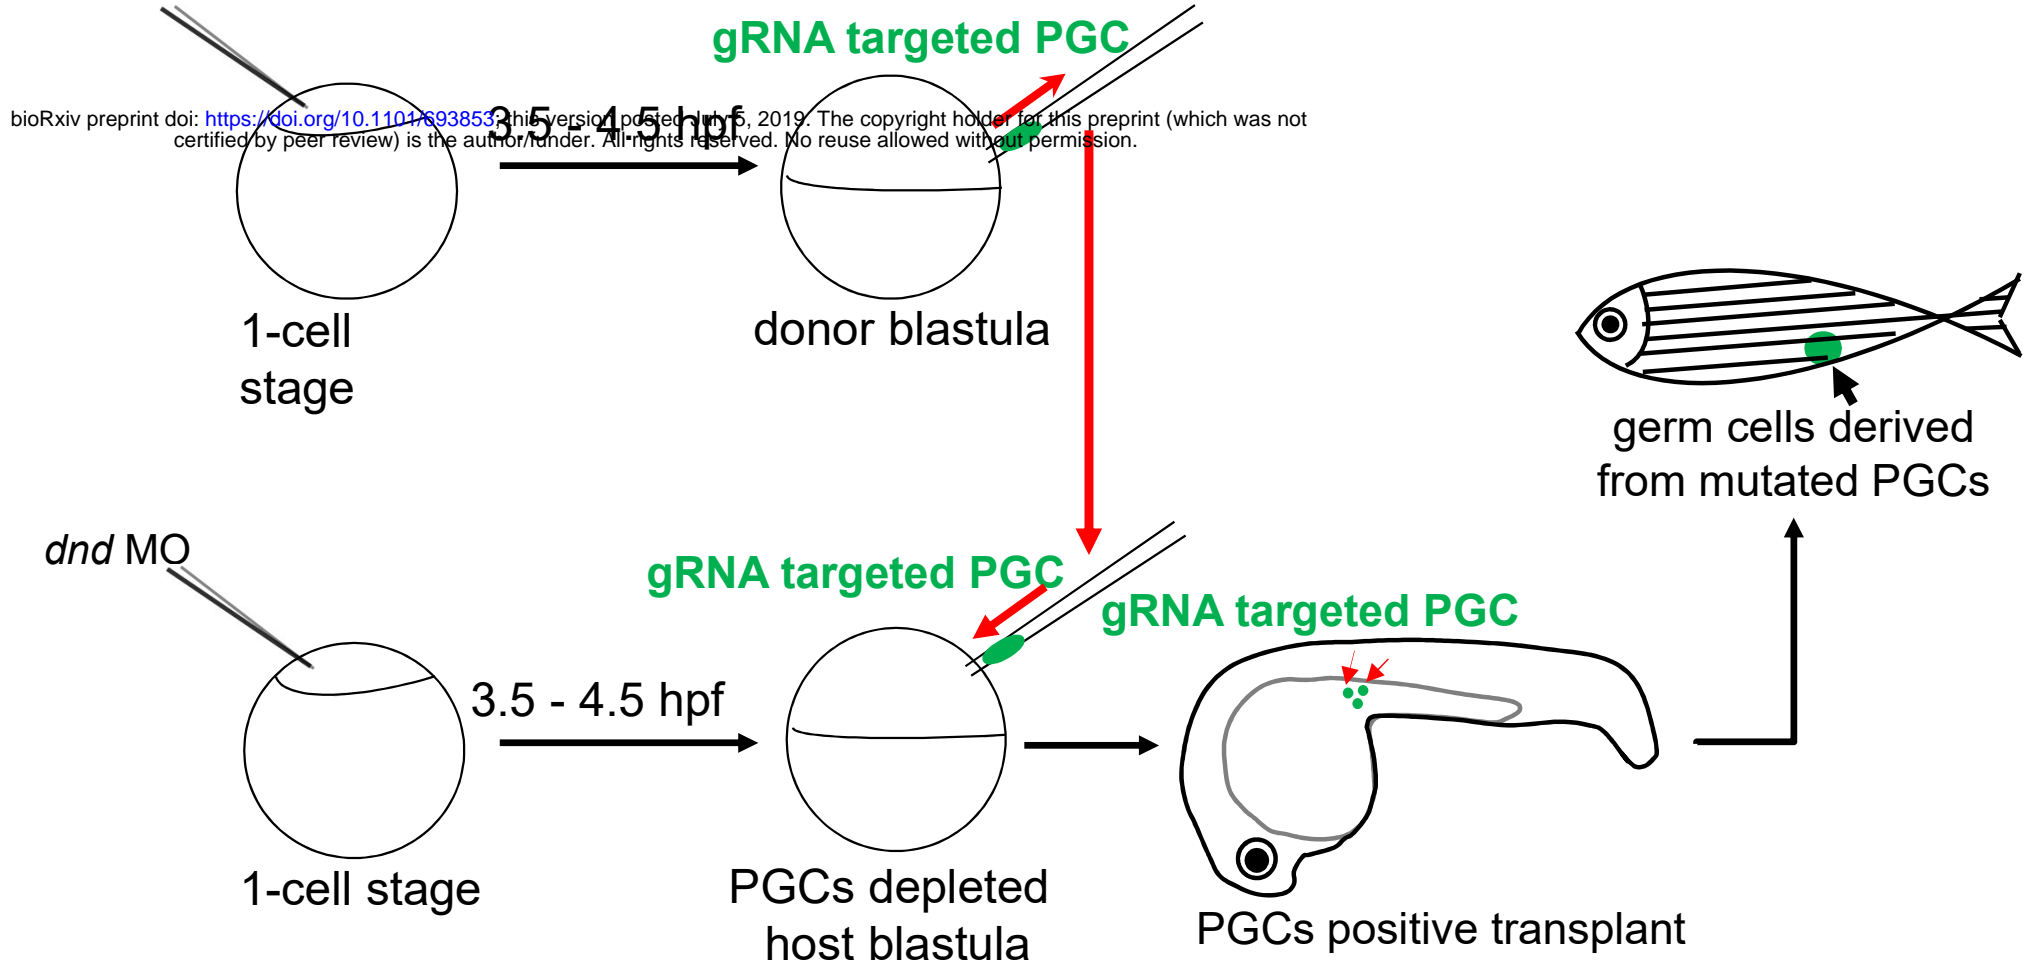

Zhang et al., Figure 3



**A**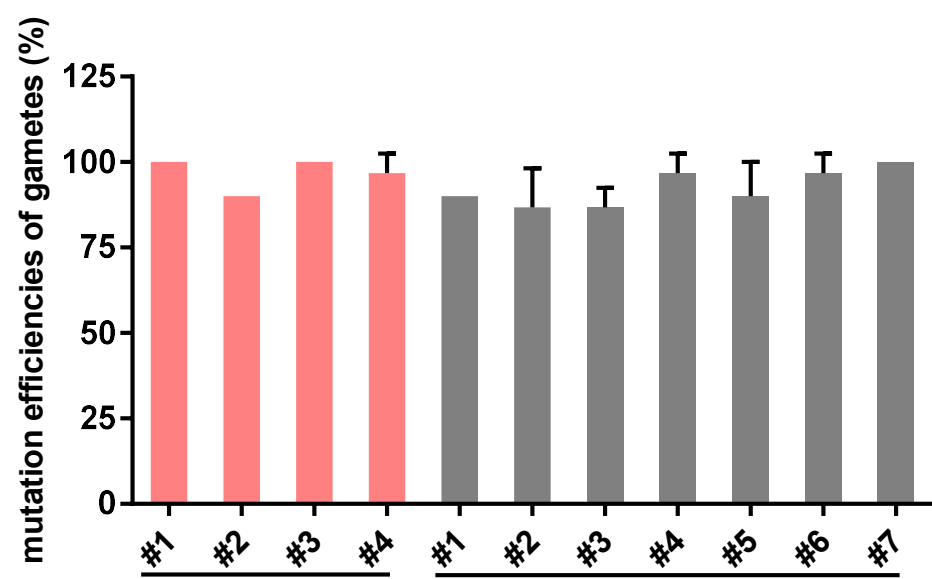

bioRxiv preprint doi: <https://doi.org/10.1101/693853>; this version posted July 5, 2019. The copyright holder for this preprint (which was not certified by peer review) is the author/funder. All rights reserved. No reuse allowed without permission.

♀ #3 × ♂ #7

**B**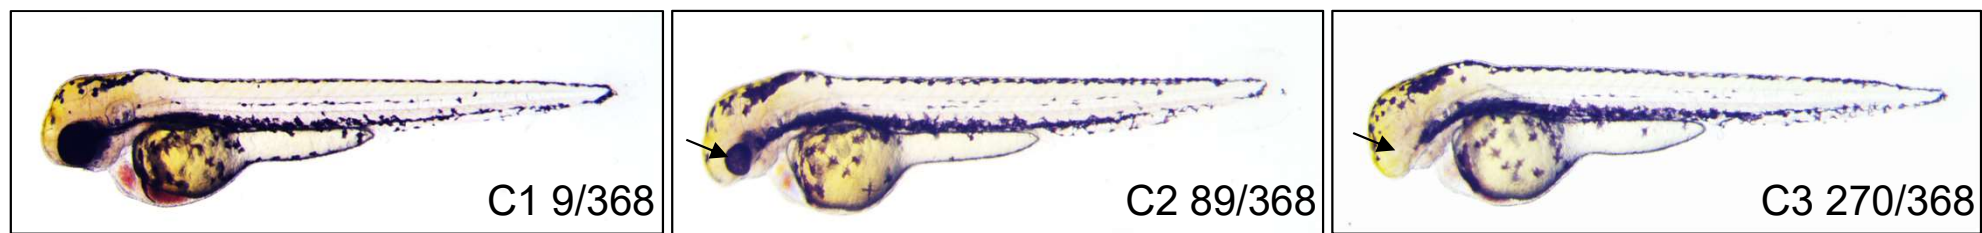**C**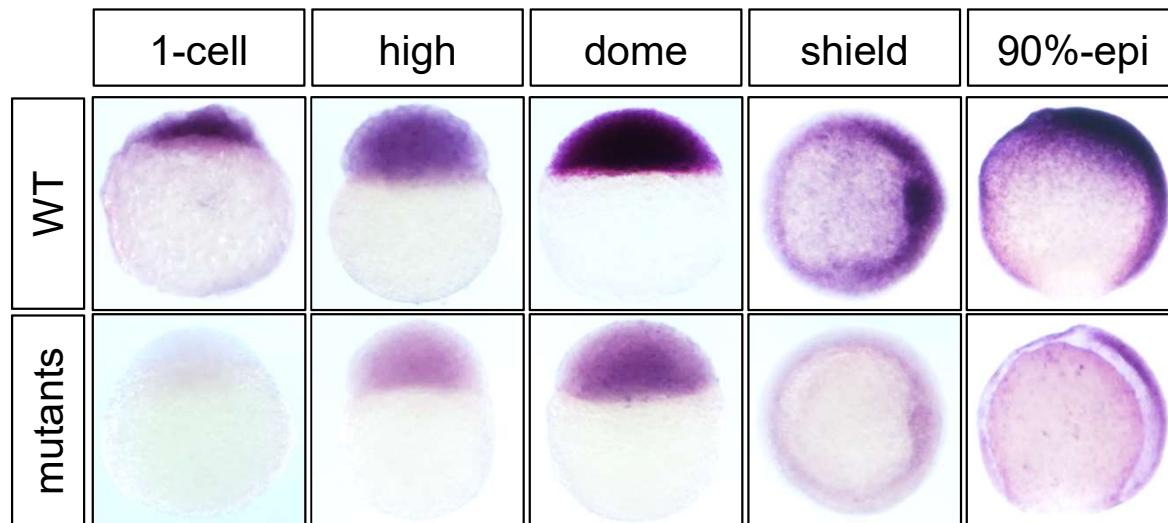**D**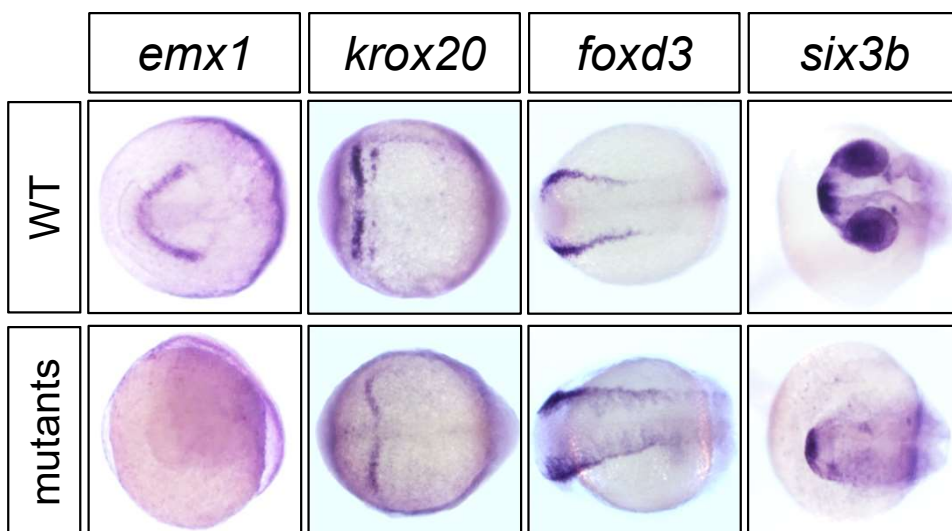

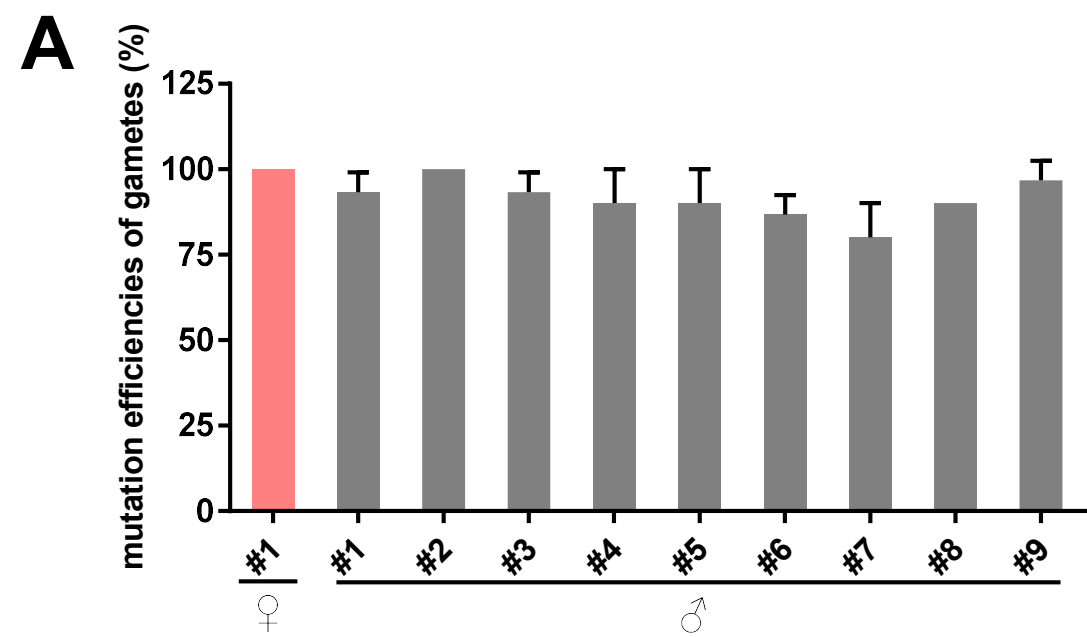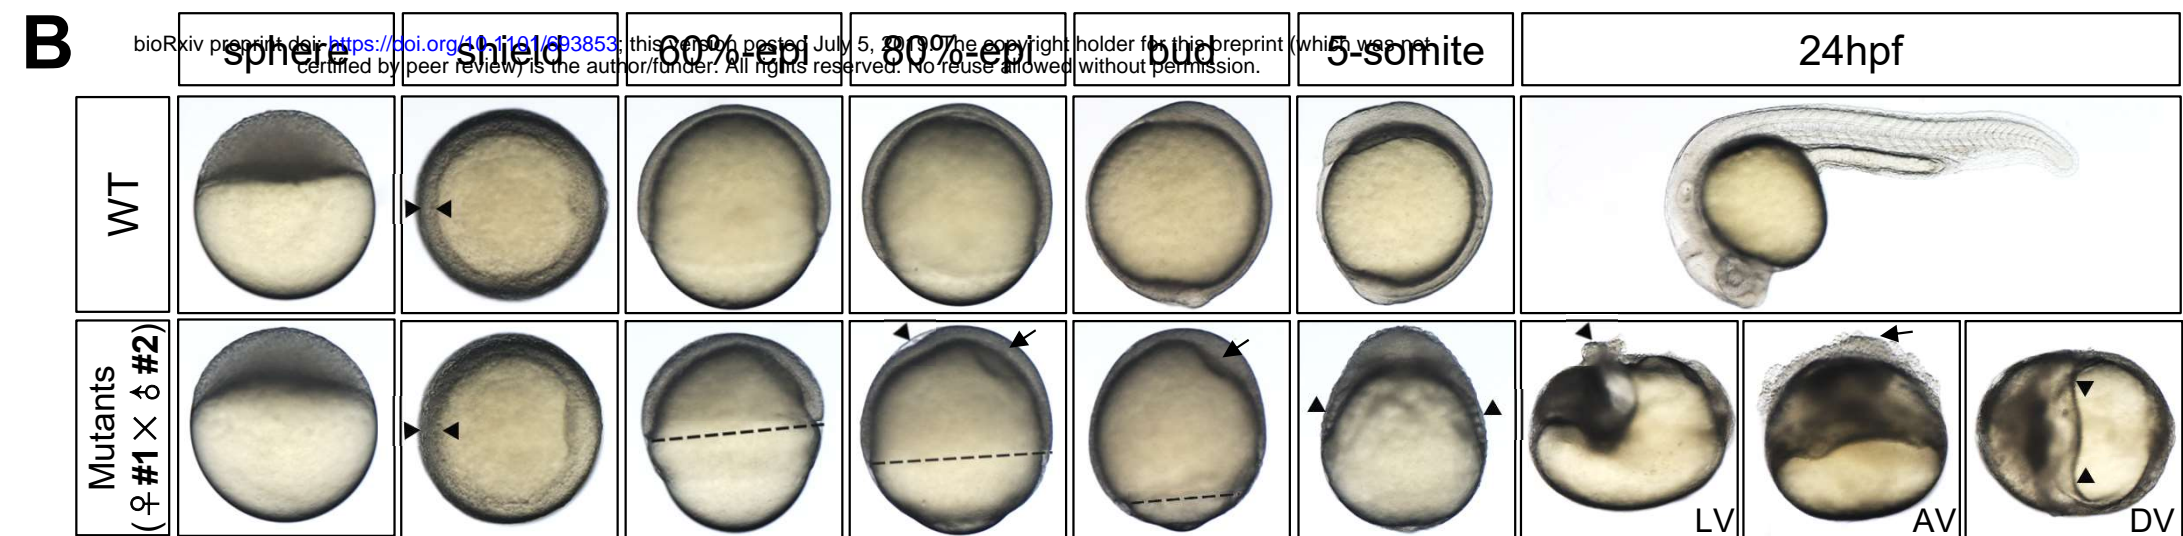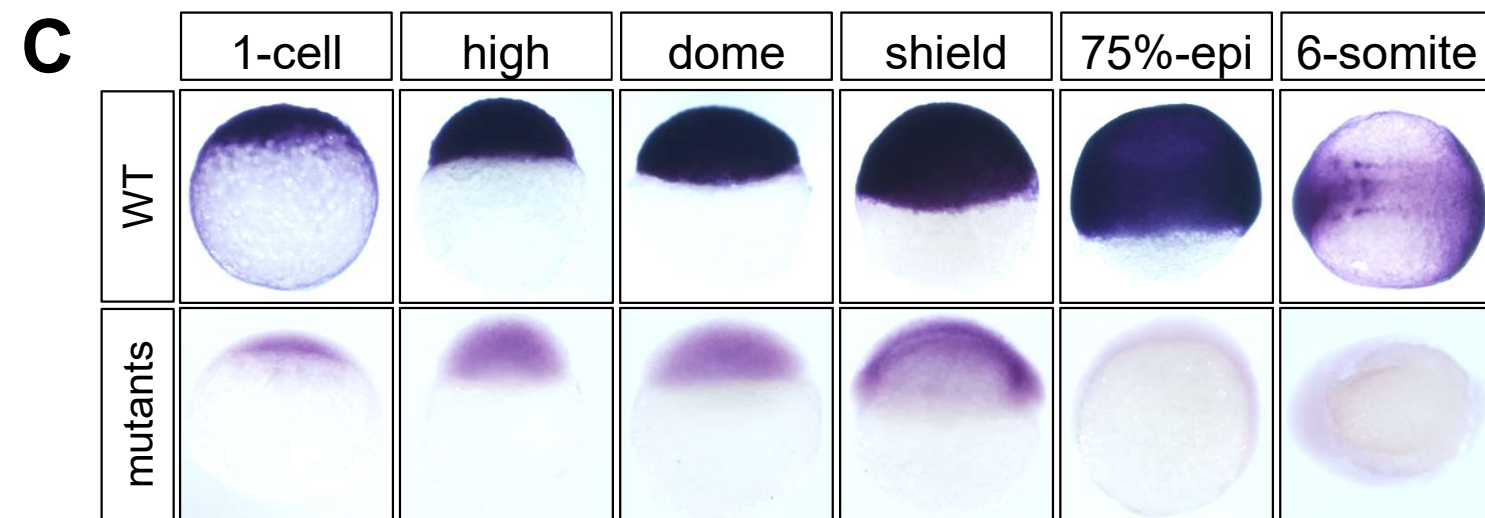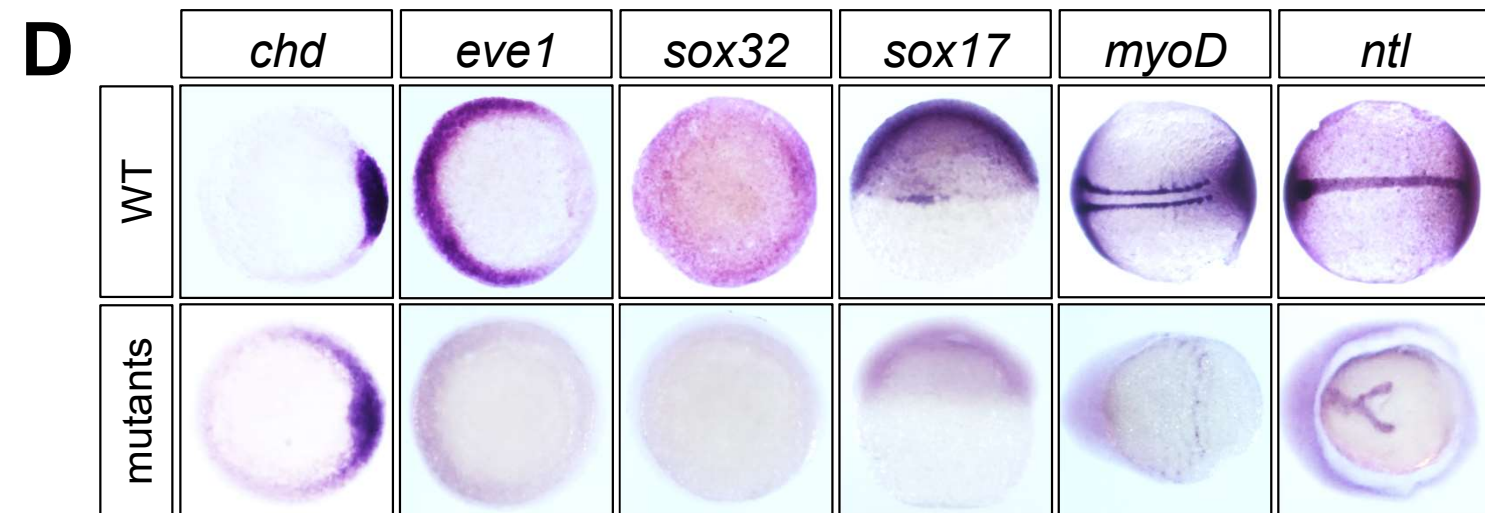

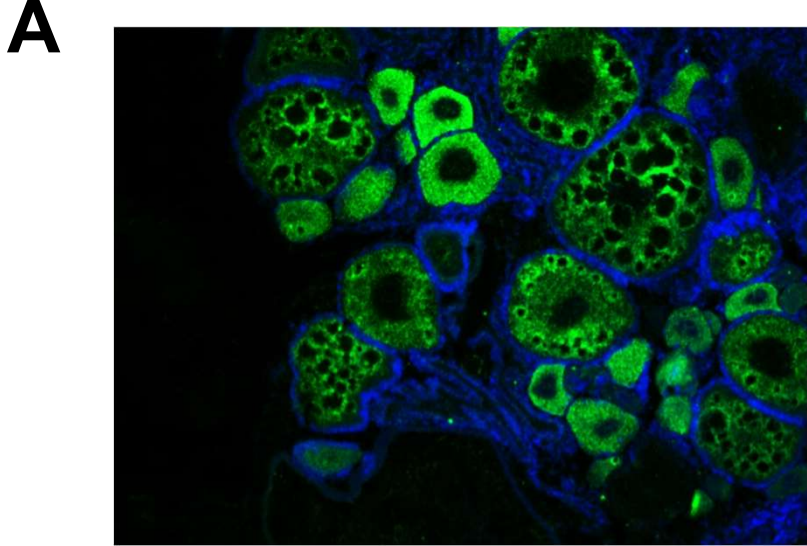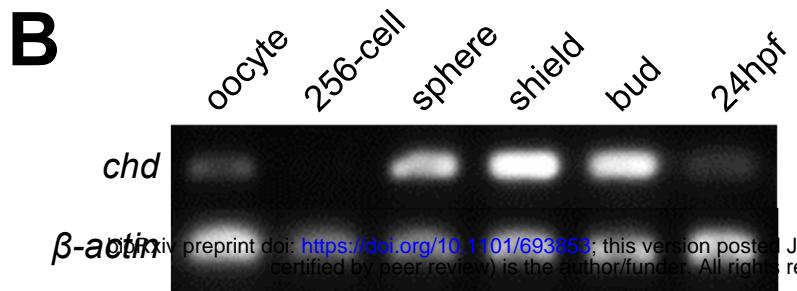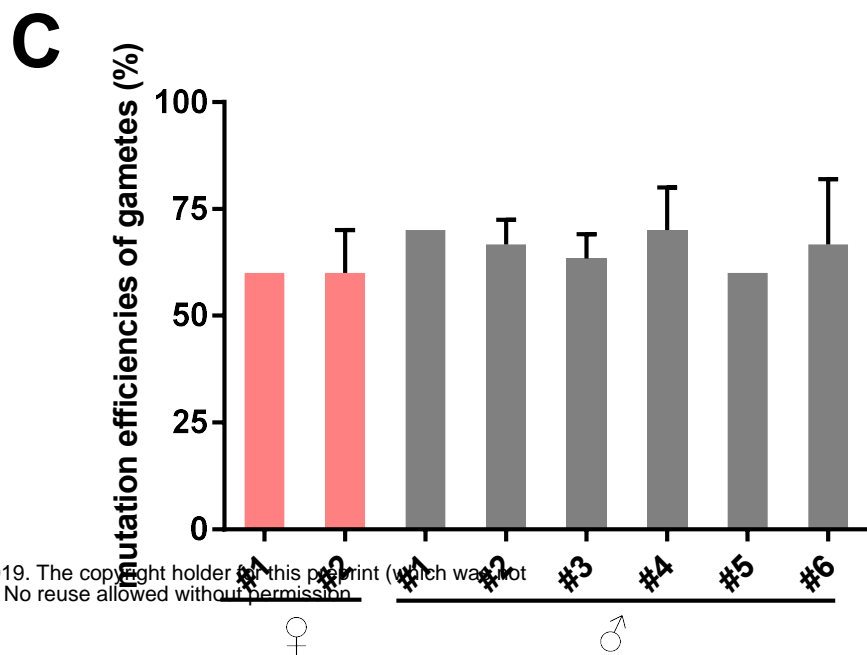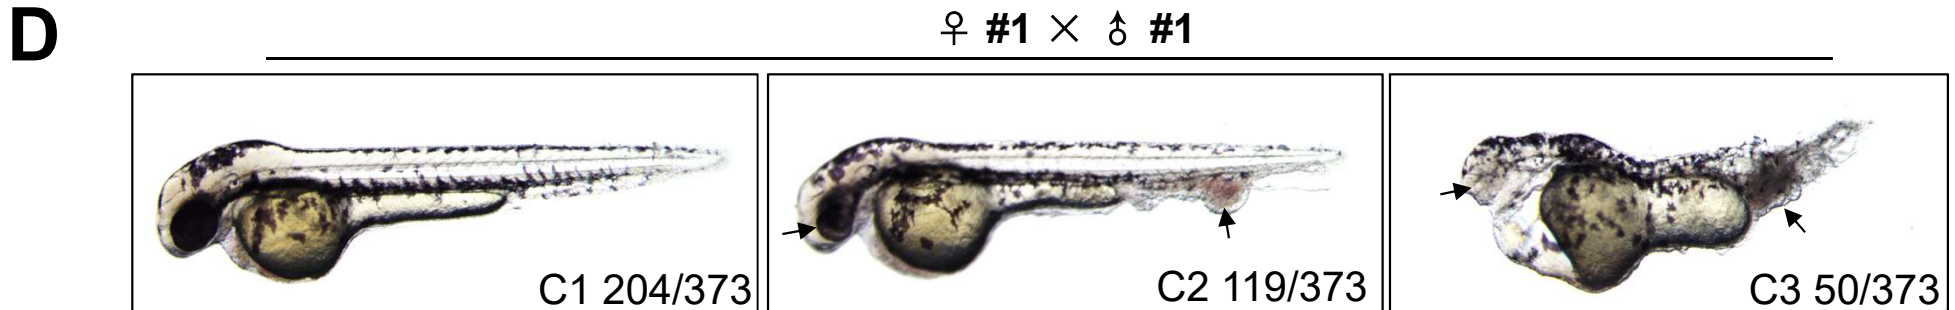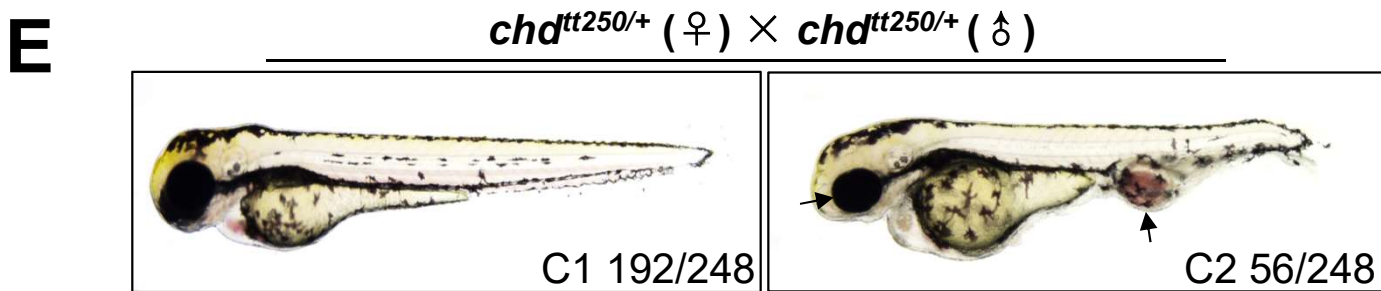

Zhang et al., Figure 6

**Supplemental Materials:**

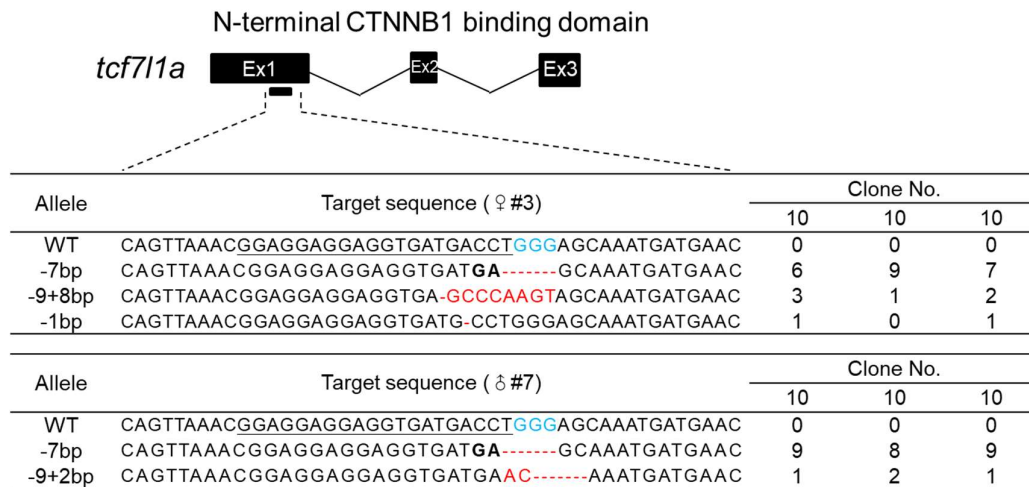

Zhang et al., Figure S1

**Figure S1** Target site location and mutation types of the gametes of two parental fishes for incross generated by CRISPR/Cas9 and PGCT for *tcf7l1a*

Ex, exon; WT, wild-type; bp, base pair; the sequence underlined represents target site, sequence in blue represents PAM, the red dotted line and sequences represent loss or insertion of bases, sequences in bold show DNA repair by microhomology-mediated end joining (MMEJ).

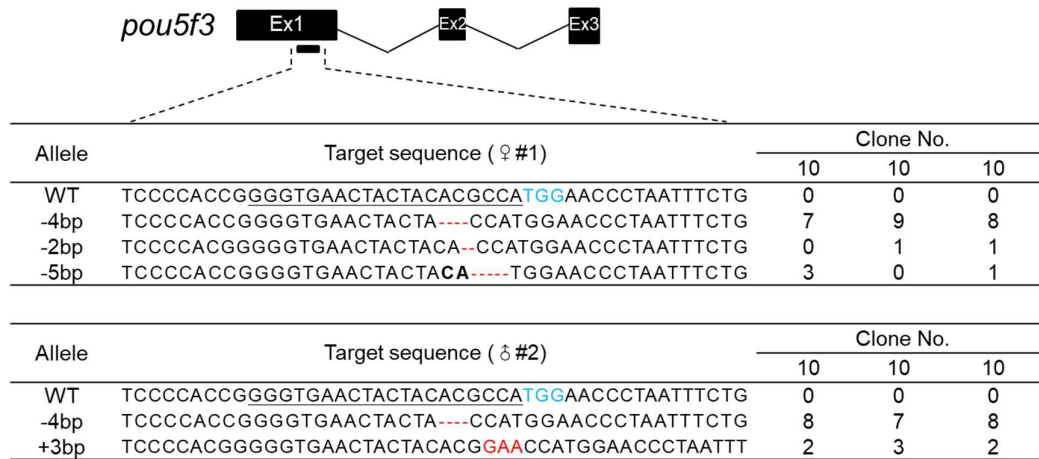

Zhang et al., Figure S2

**Figure S2** Target site location and mutation types of the gametes of two parental fishes for incross generated by CRISPR/Cas9 and PGCT for *pou5f3*

Ex, exon; WT, wild-type; bp, base pair; the sequence underlined represents target site, sequence in blue represents PAM, the red dotted line and sequences represent loss or insertion of bases, sequences in bold show DNA repair by microhomology-mediated end joining (MMEJ).

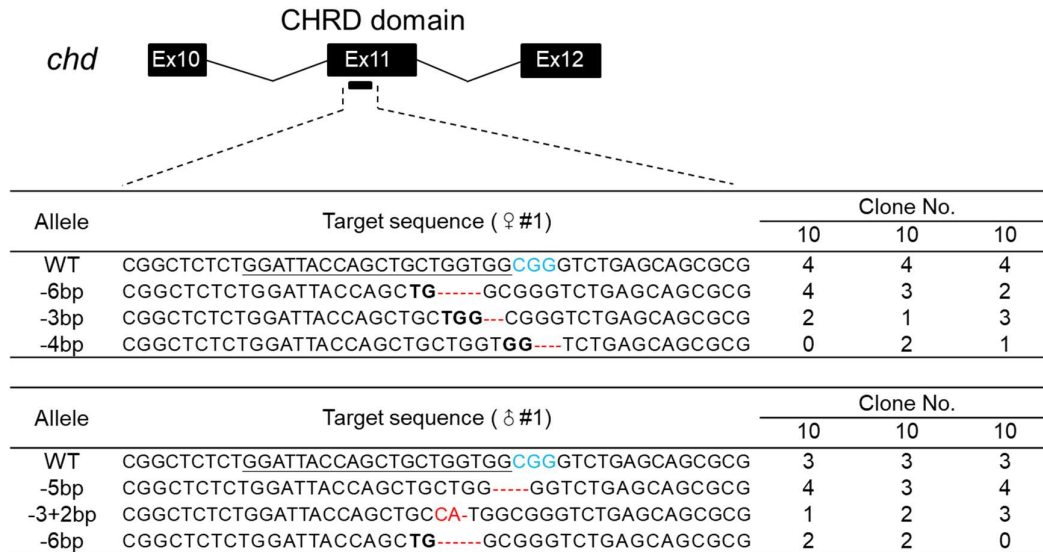

Zhang et al., Figure S3

**Figure S3** Target site location and mutation types of the gametes of two parental fishes for incross generated by CRISPR/Cas9 and PGCT for *chd*

Ex, exon; WT, wild-type; bp, base pair; the sequence underlined represents target site, sequence in blue represents PAM, the red dotted line and sequences represent loss or insertion of bases, sequences in bold show DNA repair by microhomology-mediated end joining (MMEJ).
